# Supplementary material
Source: PubMed Central journal article supplement (PMC4955771)
Supplement: NIHMS792005-supplement-1.pdf [file NIHMS792005-supplement-1.pdf]

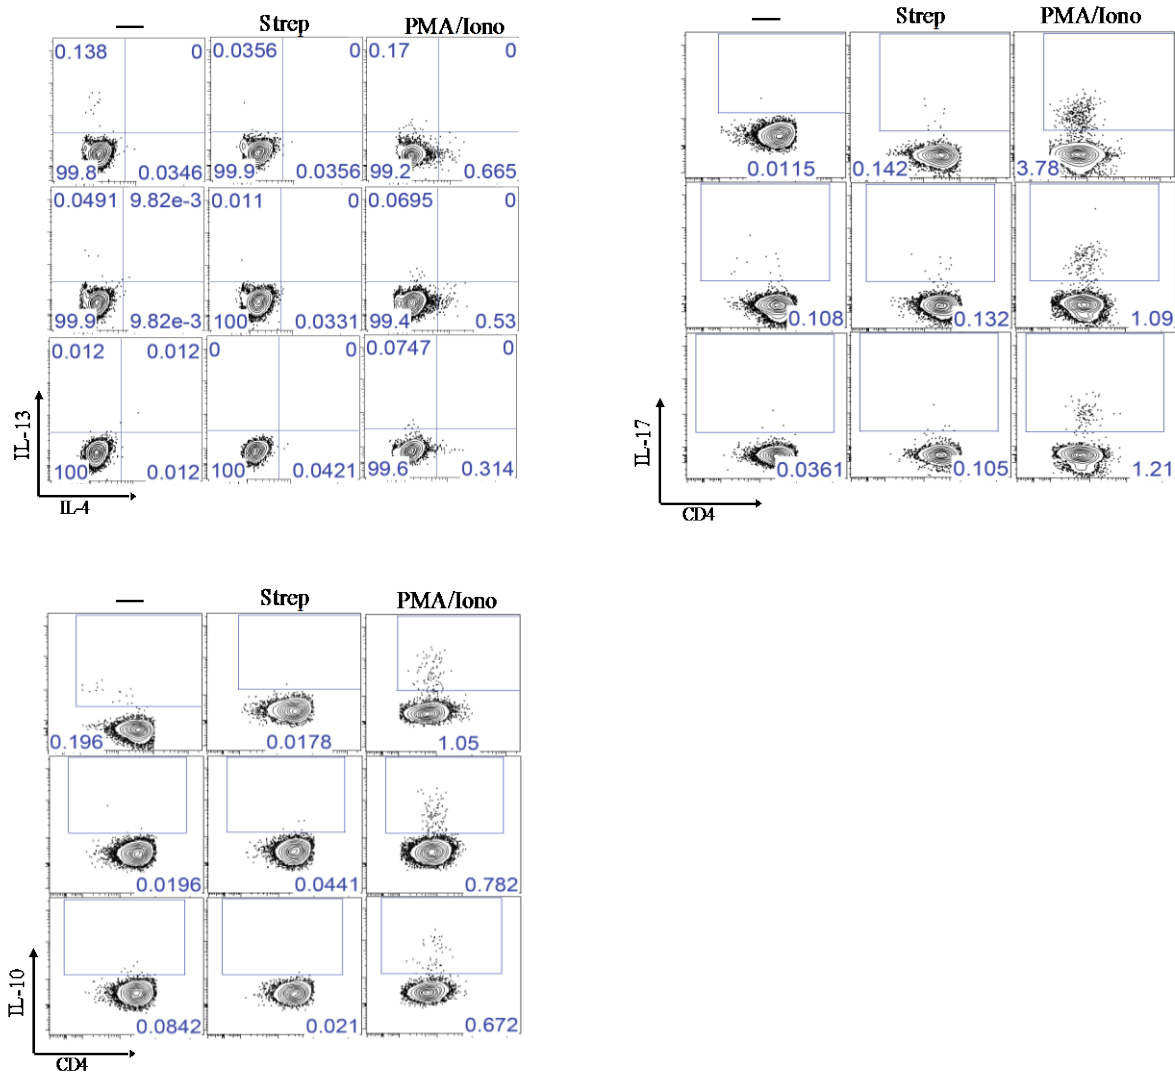

**SUPPLEMENTARY FIGURE 1.** Cytokine production by GC Tfh cells is low. This figure shows representative plots of the data in Figure 1. Representative FACS plots of intracellular cytokine production of IL-4<sup>+</sup>IL-13<sup>+</sup>, IL-10<sup>+</sup>, and IL-17<sup>+</sup> by Strep-specific GC Tfh, mTfh, and non-Tfh cells, normalized to unstimulated cells per each donor. Tonsil cells were stimulated with 10ug/mL Strep or PMA/Ionomycin, as a positive control.

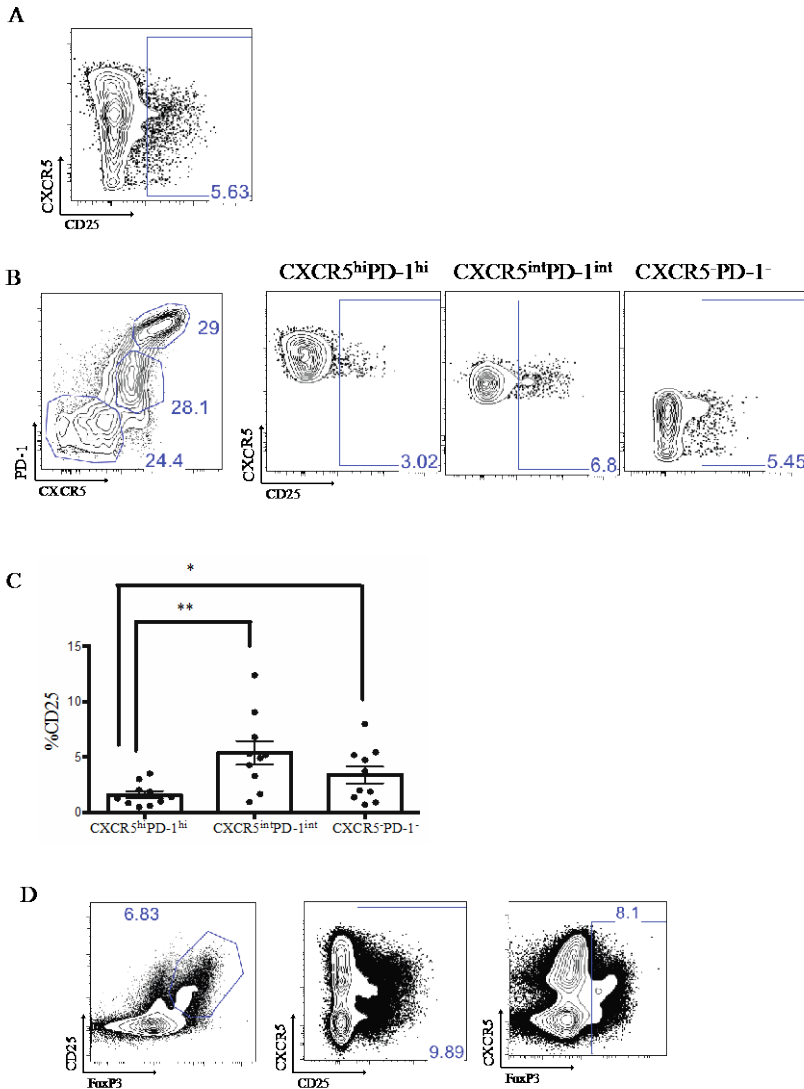

**SUPPLEMENTARY FIGURE 2.** Fresh tonsillar cells were stained for CD25 directly ex vivo, without re-stimulation. **(A).** Representative FACS plot of CXCR5 and CD25 on all CD4<sup>+</sup> T cells. **(B).** Representative FACS plots of PD-1 and CXCR5 on all CD4<sup>+</sup> T cells and % CD25 expression on the CXCR5<sup>hi</sup>PD-1<sup>hi</sup>, CXCR5<sup>int</sup>PD-1<sup>int</sup>, and CXCR5<sup>-</sup>PD-1<sup>-</sup> subsets. **(C).** Quantification of % CD25 expression on the CXCR5<sup>hi</sup>PD-1<sup>hi</sup>, CXCR5<sup>int</sup>PD-1<sup>int</sup>, and CXCR5<sup>-</sup>PD-1<sup>-</sup> subsets of CD4<sup>+</sup> T cells. % CD25 (\*, p=0.0195, \*\* p=0.0039). Data are from 10 independent donor samples. **(D).** In separate stains, intracellular staining for Foxp3 was performed. Representative FACS plots of CD25 and FoxP3; CXCR5 and CD25; and CXCR5 and FoxP3 on all CD4<sup>+</sup> T cells.

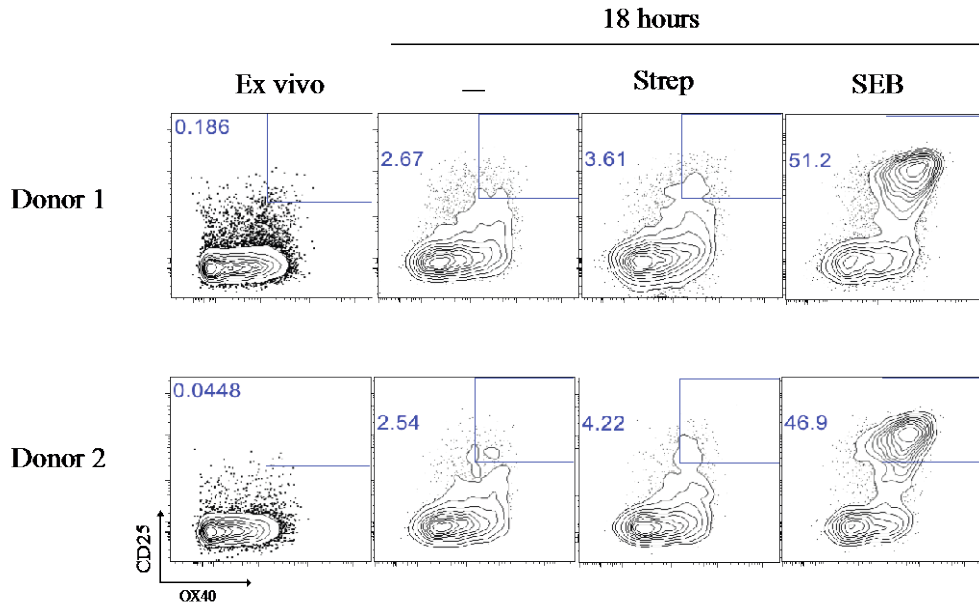

**SUPPLEMENTARY FIGURE 3.** Representative flow cytometry plots of the GC Tfh cells from two different donor samples stained for CD25<sup>+</sup>OX40<sup>+</sup> expression by GC Tfh cells directly ex vivo and after 18 hour stimulation.
