# Supplementary material
Source: PubMed Central journal article supplement (PMC4955771)
Supplement: NIHMS792005-supplement-2.pdf [file NIHMS792005-supplement-2.pdf]

**SUPPLEMENTARY TABLE 1.** Flow cytometry antibodies utilized in the AIM assay for tonsils.

**AIM Panel for Tonsils**

| <b>Antibody</b> | <b>Clone</b> | <b>Vendor</b> |
|-----------------|--------------|---------------|
| CD4 BV650       | OKT4         | Biolegend     |
| CD19 e780       | H1B19        | eBioscience   |
| CD14 e780       | 61D3         | eBioscience   |
| CD16 e780       | eBioCB16     | eBioscience   |
| CD8a e780       | RPA-T8       | eBioscience   |
| CD45RA BV570    | HI100        | Biolegend     |
| CCR7 APC        | G043H7       | Biolegend     |
| CD25 PeCy7      | BC96         | eBioscience   |
| OX40 FITC       | BER-ACT35    | Biolegend     |
| PD-L1 PE        | 29E.2A3      | Biolegend     |
| CXCR5 BV421     | J252D4       | Biolegend     |
| PD-1 BV785      | EH12.2H7     | Biolegend     |
| Live/Dead e780  | -            | eBioscience   |

**AIM Panel for PBMCs**

| <b>Antibody</b>     | <b>Clone</b> | <b>Vendor</b> |
|---------------------|--------------|---------------|
| CD4 APCeF780        | RPA-T4       | eBioscience   |
| CD3 Alexa Fluor 700 | UCHT-1       | BD            |
| CD8 V500            | RPA-T8       | BD            |
| CD19 V500           | H1B19        | BD            |
| CD14 V500           | M5E2         | BD            |
| CD25 FITC           | M-A251       | BD            |
| CD45RA eF450        | HI100        | eBioscience   |
| CCR7 PerCPCy5.5     | 6043H7       | Biolegend     |
| OX40 PECy7          | BER-ACT35    | Biolegend     |
| PD-L1 PE            | 29E.2A3      | Biolegend     |
| CXCR5 BV605         | J252D4       | Biolegend     |
| Live/Dead Aqua      | -            | eBioscience   |
